# Supplementary material for: Equine Adipose-Derived Mesenchymal Stromal Cells Release Extracellular Vesicles Enclosing Different Subsets of Small RNAs
Source: Stem Cells Int. 2019 Mar 18;2019:4957806. doi: 10.1155/2019/4957806 (PMC6442443; doi:10.1155/2019/4957806)
Supplement: Supplementary 1 — Additional File 1: gene transcript abundance in RPKM. [file 4957806.f1.xlsx]

## Sheet: Sheet1
Gene transcript abundance in RPKM and reclassification of dubious features
Geneid	Gene name	Type	Average	Notes
ENSECAT00000027586	--	miRNA	715.173	Rattus norvegicus miR-21 stem-loop
ENSECAT00000028376	--	miRNA	591879	Mus musculus miR-341 stem-loop
ENSECAT00000027881	--	miRNA	40.6117	hsa-let-7a-1L
ENSECAT00000028366	--	miRNA	34.0815	Homo sapiens miR-199b stem-loop
ENSECAT00000027511	--	miRNA	10.2237	Homo sapiens let-7f-2 stem-loop
ENSECAT00000027503	--	Mt_rRNA	171.193	Dead miRNA entry → tRNA
ENSECAT00000028787	--	snoRNA	27415.4	Dead miRNA entry → snoRNA
ENSECAT00000027340	--	rRNA	48155.5	Dead miRNA entry → rRNA
ENSECAT00000029222	--	rRNA	93501.5	Dead miRNA entry → rRNA
ENSECAT00000029259	--	rRNA	22.3077	Dead miRNA entry → rRNA
ENSECAT00000029271	--	rRNA	10591.4	Dead miRNA entry → rRNA
ENSECAT00000029298	--	rRNA	158.843	Dead miRNA entry → rRNA
ENSECAT00000029354	--	rRNA	51.9035	Dead miRNA entry → rRNA
ENSECAT00000029375	--	rRNA	22520.4	Dead miRNA entry → rRNA
ENSECAT00000029490	--	rRNA	1469.6	Dead miRNA entry → rRNA
ENSECAT00000029502	--	rRNA	1.85291e+06	Dead miRNA entry → rRNA
ENSECAT00000029560	--	rRNA	47.8519	Dead miRNA entry → rRNA
ENSECAT00000029632	--	rRNA	440.699	Dead miRNA entry → rRNA
ENSECAT00000029666	--	rRNA	12.0961	Dead miRNA entry → rRNA
ENSECAT00000029690	--	rRNA	30860.9	Dead miRNA entry → rRNA
ENSECAT00000029713	--	rRNA	2168.89	Dead miRNA entry → rRNA
ENSECAT00000029790	--	rRNA	7387.01	Dead miRNA entry → rRNA
ENSECAT00000029800	--	rRNA	897.253	Dead miRNA entry → rRNA
ENSECAT00000028071	--	miRNA	15.6474	Canis familiaris miR-10b stem-loop
ENSECAT00000027366	--	miRNA	68.1914	Bos taurus miR-423 stem-loop
ENSECAT00000027645	--	miRNA	10.2622	Bos taurus miR-27b stem-loop
ENSECAT00000029622	--	miRNA	1372.98	Bos taurus miR-2427 stem-loop
ENSECAT00000028115	--	miRNA	558.436	Bos taurus let-7b stem-loop
ENSECAT00000027486	U1	snRNA	11.8374
ENSECAT00000027997	U1	snRNA	55.4849
ENSECAT00000028319	U1	snRNA	12934.7
ENSECAT00000027383	U11	snRNA	1297.16
ENSECAT00000027771	U12	snRNA	1087.07
ENSECAT00000027459	U2	snRNA	10.1243
ENSECAT00000027535	U2	snRNA	55.5576
ENSECAT00000027609	U2	snRNA	449.487
ENSECAT00000028038	U2	snRNA	22.3438
ENSECAT00000028255	U2	snRNA	95.9205
ENSECAT00000028256	U2	snRNA	36.0717
ENSECAT00000028536	U2	snRNA	18.7077
ENSECAT00000028612	U2	snRNA	69.1748
ENSECAT00000027825	U4	snRNA	72.5011
ENSECAT00000028405	U4	snRNA	165.811
ENSECAT00000027519	U4atac	snRNA	73.5092
ENSECAT00000027339	U5	snRNA	372.076
ENSECAT00000027505	U5	snRNA	458.599
ENSECAT00000027675	U5	snRNA	4570.08
ENSECAT00000028093	U5	snRNA	382.969
ENSECAT00000028198	U5	snRNA	181.178
ENSECAT00000028233	U5	snRNA	60.8594
ENSECAT00000027582	U6	snRNA	10.199
ENSECAT00000028436	U6	snRNA	10.7771
ENSECAT00000029448	U7	snRNA	11.009
ENSECAT00000029260	ACA64	snoRNA	13.5194
ENSECAT00000029209	SCARNA11	snoRNA	208.346
ENSECAT00000029428	SCARNA13	snoRNA	146.484
ENSECAT00000029797	SCARNA14	snoRNA	42.8088
ENSECAT00000029196	SCARNA15	snoRNA	71.8207
ENSECAT00000029205	SCARNA15	snoRNA	25.6932
ENSECAT00000029584	SCARNA18	snoRNA	93.3658
ENSECAT00000029226	SCARNA2	snoRNA	98.5662
ENSECAT00000029648	SCARNA20	snoRNA	192.989
ENSECAT00000029288	SCARNA21	snoRNA	28.4798
ENSECAT00000029597	SCARNA23	snoRNA	54.3437
ENSECAT00000029792	SCARNA24	snoRNA	330.166
ENSECAT00000029807	SCARNA3	snoRNA	31.3611
ENSECAT00000029280	SCARNA6	snoRNA	14.5751
ENSECAT00000029376	SCARNA7	snoRNA	159.476
ENSECAT00000029291	SCARNA8	snoRNA	170.98
ENSECAT00000027332	snoMBII-202	snoRNA	6287.53
ENSECAT00000027974	snoR38	snoRNA	311.211
ENSECAT00000027989	snoR38	snoRNA	528.466
ENSECAT00000028621	snoR38	snoRNA	19207.3
ENSECAT00000027268	SNORA1	snoRNA	43.6861
ENSECAT00000027261	SNORA11	snoRNA	40.3585
ENSECAT00000027267	SNORA11	snoRNA	53.6086
ENSECAT00000028325	SNORA11	snoRNA	189.846
ENSECAT00000027219	SNORA13	snoRNA	144.771
ENSECAT00000028624	SNORA14	snoRNA	44.0122
ENSECAT00000028072	SNORA16	snoRNA	1027.6
ENSECAT00000028448	SNORA17	snoRNA	73.473
ENSECAT00000027415	SNORA18	snoRNA	206.127
ENSECAT00000028439	SNORA19	snoRNA	198.728
ENSECAT00000027318	SNORA2	snoRNA	19.2554
ENSECAT00000028023	SNORA2	snoRNA	139.084
ENSECAT00000028039	SNORA2	snoRNA	970.248
ENSECAT00000028199	SNORA20	snoRNA	88.5589
ENSECAT00000028336	SNORA21	snoRNA	2066.9
ENSECAT00000029828	SNORA21	snoRNA	83.6409
ENSECAT00000027915	SNORA22	snoRNA	73.2489
ENSECAT00000027363	SNORA23	snoRNA	102.036
ENSECAT00000027643	SNORA24	snoRNA	510.692
ENSECAT00000028045	SNORA24	snoRNA	44.1971
ENSECAT00000027762	SNORA27	snoRNA	27.8388
ENSECAT00000027774	SNORA27	snoRNA	46.5748
ENSECAT00000028219	SNORA28	snoRNA	1272.41
ENSECAT00000027463	SNORA29	snoRNA	209.313
ENSECAT00000027225	SNORA3	snoRNA	2478.6
ENSECAT00000027592	SNORA3	snoRNA	405.48
ENSECAT00000027666	SNORA30	snoRNA	330.295
ENSECAT00000028518	SNORA30	snoRNA	18.7959
ENSECAT00000027749	SNORA31	snoRNA	41.2415
ENSECAT00000028029	SNORA31	snoRNA	73.3232
ENSECAT00000028403	SNORA32	snoRNA	173.562
ENSECAT00000027707	SNORA33	snoRNA	10.4117
ENSECAT00000027434	SNORA38	snoRNA	106.467
ENSECAT00000027715	SNORA40	snoRNA	172.277
ENSECAT00000027878	SNORA41	snoRNA	182.429
ENSECAT00000027630	SNORA42	snoRNA	1509.35
ENSECAT00000027452	SNORA43	snoRNA	432.91
ENSECAT00000027880	SNORA44	snoRNA	731.665
ENSECAT00000028604	SNORA46	snoRNA	20.3569
ENSECAT00000028142	SNORA48	snoRNA	42.119
ENSECAT00000029463	SNORA48	snoRNA	15.3966
ENSECAT00000027728	SNORA49	snoRNA	49.0729
ENSECAT00000027781	SNORA5	snoRNA	43.1362
ENSECAT00000028252	SNORA5	snoRNA	113.142
ENSECAT00000027656	SNORA50	snoRNA	142.548
ENSECAT00000027841	SNORA50	snoRNA	349.065
ENSECAT00000027350	SNORA51	snoRNA	42.0768
ENSECAT00000028191	SNORA52	snoRNA	301.215
ENSECAT00000027380	SNORA53	snoRNA	769.977
ENSECAT00000028022	SNORA54	snoRNA	221.386
ENSECAT00000028628	SNORA55	snoRNA	191.595
ENSECAT00000027454	SNORA57	snoRNA	167.696
ENSECAT00000028141	SNORA58	snoRNA	31.6872
ENSECAT00000027655	SNORA61	snoRNA	45.7749
ENSECAT00000027784	SNORA61	snoRNA	732.023
ENSECAT00000027521	SNORA62	snoRNA	617.097
ENSECAT00000028383	SNORA62	snoRNA	151.629
ENSECAT00000027516	SNORA63	snoRNA	163.776
ENSECAT00000027196	SNORA64	snoRNA	73.5255
ENSECAT00000027220	SNORA64	snoRNA	1842.63
ENSECAT00000027779	SNORA65	snoRNA	582.776
ENSECAT00000028425	SNORA66	snoRNA	81.4442
ENSECAT00000027579	SNORA67	snoRNA	72.4126
ENSECAT00000027976	SNORA68	snoRNA	130.975
ENSECAT00000027815	SNORA69	snoRNA	67.4985
ENSECAT00000027836	SNORA7	snoRNA	2404.24
ENSECAT00000027573	SNORA71	snoRNA	629.994
ENSECAT00000028172	SNORA71	snoRNA	216.762
ENSECAT00000028257	SNORA71	snoRNA	361.406
ENSECAT00000027439	SNORA72	snoRNA	46.7122
ENSECAT00000027471	SNORA73	snoRNA	159.989
ENSECAT00000027899	SNORA73	snoRNA	285.081
ENSECAT00000027628	SNORA74	snoRNA	29.1714
ENSECAT00000028001	SNORA74	snoRNA	28.2157
ENSECAT00000028046	SNORA75	snoRNA	59.337
ENSECAT00000027596	SNORA77	snoRNA	325.196
ENSECAT00000027791	SNORA79	snoRNA	66.1703
ENSECAT00000027495	SNORA8	snoRNA	823.131
ENSECAT00000029273	SNORA81	snoRNA	100.465
ENSECAT00000029541	SNORA84	snoRNA	552.917
ENSECAT00000027531	SNORA9	snoRNA	178.023
ENSECAT00000029794	SNORD10	snoRNA	156.004
ENSECAT00000027642	SNORD100	snoRNA	1066.64
ENSECAT00000027982	SNORD101	snoRNA	15561
ENSECAT00000027298	SNORD102	snoRNA	6784.28
ENSECAT00000028351	SNORD105	snoRNA	3480.21
ENSECAT00000029466	SNORD107	snoRNA	1373.08
ENSECAT00000029673	SNORD109A	snoRNA	51.574
ENSECAT00000029412	SNORD11	snoRNA	129.065
ENSECAT00000028534	SNORD110	snoRNA	6035.13
ENSECAT00000027914	SNORD111	snoRNA	1752.38
ENSECAT00000028368	SNORD111	snoRNA	6777.56
ENSECAT00000028289	SNORD112	snoRNA	119.336
ENSECAT00000027272	SNORD113	snoRNA	41.2629
ENSECAT00000027295	SNORD113	snoRNA	13.5477
ENSECAT00000027357	SNORD113	snoRNA	10.2022
ENSECAT00000027411	SNORD113	snoRNA	282.138
ENSECAT00000027412	SNORD113	snoRNA	224.661
ENSECAT00000027430	SNORD113	snoRNA	82.726
ENSECAT00000027436	SNORD113	snoRNA	23.134
ENSECAT00000027482	SNORD113	snoRNA	13.5977
ENSECAT00000027622	SNORD113	snoRNA	102.837
ENSECAT00000027634	SNORD113	snoRNA	157.412
ENSECAT00000027972	SNORD113	snoRNA	37.5298
ENSECAT00000028092	SNORD113	snoRNA	209.058
ENSECAT00000028097	SNORD113	snoRNA	23.6262
ENSECAT00000028152	SNORD113	snoRNA	34.8175
ENSECAT00000028205	SNORD113	snoRNA	140.141
ENSECAT00000028232	SNORD113	snoRNA	44.975
ENSECAT00000028284	SNORD113	snoRNA	36.0324
ENSECAT00000028545	SNORD113	snoRNA	23.9368
ENSECAT00000028566	SNORD113	snoRNA	137.345
ENSECAT00000028732	SNORD113	snoRNA	73.9122
ENSECAT00000027423	SNORD116	snoRNA	11.7803
ENSECAT00000029252	SNORD116	snoRNA	48.9413
ENSECAT00000029566	SNORD11B	snoRNA	84.6916
ENSECAT00000027249	SNORD12	snoRNA	26157.8
ENSECAT00000027876	SNORD12	snoRNA	1459.24
ENSECAT00000029696	SNORD121A	snoRNA	3237.47
ENSECAT00000029711	SNORD121A	snoRNA	685.911
ENSECAT00000029372	SNORD123	snoRNA	803.103
ENSECAT00000029244	SNORD124	snoRNA	580.717
ENSECAT00000029339	SNORD125	snoRNA	571.825
ENSECAT00000029421	SNORD126	snoRNA	70.3289
ENSECAT00000029276	SNORD127	snoRNA	2001.09
ENSECAT00000027286	SNORD14	snoRNA	1672.61
ENSECAT00000027680	SNORD14	snoRNA	1310.4
ENSECAT00000027806	SNORD14	snoRNA	436.126
ENSECAT00000028052	SNORD14	snoRNA	19.7021
ENSECAT00000028290	SNORD15	snoRNA	81.3516
ENSECAT00000028468	SNORD15	snoRNA	46.6267
ENSECAT00000027702	SNORD16	snoRNA	684.447
ENSECAT00000027211	SNORD17	snoRNA	78.7779
ENSECAT00000027524	SNORD18	snoRNA	33232.3
ENSECAT00000027688	SNORD18	snoRNA	3321.65
ENSECAT00000027827	SNORD18	snoRNA	3937.4
ENSECAT00000027705	SNORD19	snoRNA	194.08
ENSECAT00000028685	SNORD19	snoRNA	22708.5
ENSECAT00000029785	SNORD19B	snoRNA	4523.47
ENSECAT00000029680	SNORD2	snoRNA	35571.6
ENSECAT00000029742	SNORD2	snoRNA	28.6561
ENSECAT00000028315	SNORD20	snoRNA	43723.5
ENSECAT00000027872	SNORD21	snoRNA	2584.72
ENSECAT00000028085	SNORD22	snoRNA	844.807
ENSECAT00000028532	SNORD22	snoRNA	91.7305
ENSECAT00000027795	SNORD23	snoRNA	42.5743
ENSECAT00000027513	SNORD24	snoRNA	13307.2
ENSECAT00000027738	SNORD24	snoRNA	138730
ENSECAT00000027956	SNORD26	snoRNA	25911.9
ENSECAT00000027720	SNORD27	snoRNA	6891.55
ENSECAT00000027276	SNORD28	snoRNA	88.3516
ENSECAT00000027706	SNORD29	snoRNA	20833.6
ENSECAT00000028370	SNORD29	snoRNA	20.5324
ENSECAT00000027560	SNORD30	snoRNA	90259.8
ENSECAT00000027561	SNORD31	snoRNA	90260.8
ENSECAT00000027562	SNORD32	snoRNA	90261.8
ENSECAT00000028627	SNORD33	snoRNA	952.172
ENSECAT00000029444	SNORD34	snoRNA	2017.92
ENSECAT00000027355	SNORD35	snoRNA	151.983
ENSECAT00000027885	SNORD36	snoRNA	1005.07
ENSECAT00000027979	SNORD36	snoRNA	14878.3
ENSECAT00000028037	SNORD36	snoRNA	357.155
ENSECAT00000028622	SNORD37	snoRNA	25871.8
ENSECAT00000028335	SNORD38	snoRNA	897.863
ENSECAT00000028554	SNORD38	snoRNA	32122.7
ENSECAT00000027209	SNORD41	snoRNA	3094.84
ENSECAT00000028676	SNORD41	snoRNA	8376.92
ENSECAT00000028000	SNORD42	snoRNA	78046.5
ENSECAT00000028517	SNORD42	snoRNA	53789.5
ENSECAT00000027506	SNORD43	snoRNA	268646
ENSECAT00000027740	SNORD44	snoRNA	50442.9
ENSECAT00000027331	SNORD45	snoRNA	42.6642
ENSECAT00000027427	SNORD45	snoRNA	3356.12
ENSECAT00000028571	SNORD45	snoRNA	4599.48
ENSECAT00000027945	SNORD46	snoRNA	2089.18
ENSECAT00000028274	SNORD47	snoRNA	10017.2
ENSECAT00000027376	SNORD48	snoRNA	18746.4
ENSECAT00000027569	SNORD49	snoRNA	152208
ENSECAT00000028262	SNORD49	snoRNA	35332.5
ENSECAT00000029599	SNORD5	snoRNA	3300.06
ENSECAT00000027413	SNORD50	snoRNA	5474.04
ENSECAT00000028008	SNORD50	snoRNA	37.9995
ENSECAT00000028332	SNORD50	snoRNA	14059.4
ENSECAT00000028579	SNORD52	snoRNA	7392.13
ENSECAT00000027992	SNORD56	snoRNA	835.726
ENSECAT00000027903	SNORD57	snoRNA	15238.3
ENSECAT00000027213	SNORD58	snoRNA	1857.23
ENSECAT00000027971	SNORD58	snoRNA	11673.3
ENSECAT00000028276	SNORD58	snoRNA	13029.8
ENSECAT00000028609	SNORD58	snoRNA	8992.53
ENSECAT00000027279	SNORD59	snoRNA	3692.84
ENSECAT00000027801	SNORD59	snoRNA	405.483
ENSECAT00000027721	SNORD60	snoRNA	808.947
ENSECAT00000027662	SNORD62	snoRNA	154.356
ENSECAT00000028355	SNORD62	snoRNA	814.859
ENSECAT00000027491	SNORD63	snoRNA	1156.81
ENSECAT00000028446	SNORD65	snoRNA	2091.26
ENSECAT00000028493	SNORD66	snoRNA	2969.29
ENSECAT00000027902	SNORD67	snoRNA	64.2243
ENSECAT00000028578	SNORD69	snoRNA	43383.1
ENSECAT00000027692	SNORD70	snoRNA	2489.37
ENSECAT00000028610	SNORD70	snoRNA	101.71
ENSECAT00000028474	SNORD71	snoRNA	1632.04
ENSECAT00000028028	SNORD72	snoRNA	2589.5
ENSECAT00000027866	SNORD73	snoRNA	13046.3
ENSECAT00000028404	SNORD73	snoRNA	13907.1
ENSECAT00000027575	SNORD74	snoRNA	15378.9
ENSECAT00000027765	SNORD77	snoRNA	37.9201
ENSECAT00000027966	SNORD78	snoRNA	2047.42
ENSECAT00000027374	SNORD79	snoRNA	1515.48
ENSECAT00000027384	SNORD81	snoRNA	31411.2
ENSECAT00000027993	SNORD82	snoRNA	17459.4
ENSECAT00000027301	SNORD83	snoRNA	1233.51
ENSECAT00000028333	SNORD83	snoRNA	144.266
ENSECAT00000027877	SNORD86	snoRNA	12.8674
ENSECAT00000027631	SNORD87	snoRNA	1468.39
ENSECAT00000027230	SNORD88	snoRNA	20.3584
ENSECAT00000027456	SNORD88	snoRNA	103.047
ENSECAT00000027999	SNORD89	snoRNA	1851.05
ENSECAT00000027405	SNORD90	snoRNA	1138.49
ENSECAT00000027346	SNORD91	snoRNA	2687.15
ENSECAT00000028506	SNORD91	snoRNA	102.184
ENSECAT00000027733	SNORD93	snoRNA	1099.93
ENSECAT00000027659	SNORD94	snoRNA	182.725
ENSECAT00000028548	SNORD95	snoRNA	14324.2
ENSECAT00000027941	SNORD96	snoRNA	11942.3
ENSECAT00000029831	SNORD97	snoRNA	215.702
ENSECAT00000028143	SNORD98	snoRNA	1744.14
ENSECAT00000027514	SNORD99	snoRNA	3342.02
ENSECAT00000028155	SNORND104	snoRNA	120930
ENSECAT00000027947	snosnR60_Z15	snoRNA	3723.56
ENSECAT00000029555	snoU105B	snoRNA	798.981
ENSECAT00000029180	snoU109	snoRNA	45.151
ENSECAT00000029367	snoU13	snoRNA	42.54
ENSECAT00000029409	snoU13	snoRNA	18006.8
ENSECAT00000027458	snoU2_19	snoRNA	17.5328
ENSECAT00000028299	snoU2-30	snoRNA	73.0579
ENSECAT00000029405	snoU54	snoRNA	1408.49
ENSECAT00000027697	snoU6-53	snoRNA	11.5635
ENSECAT00000028076	snoU6-53	snoRNA	21.7465
ENSECAT00000028099	snoU61	snoRNA	1820.25
ENSECAT00000027394	snoU83B	snoRNA	91.5785
ENSECAT00000028418	snoU83B	snoRNA	1441.27
ENSECAT00000029698	snoU85	snoRNA	182.503
ENSECAT00000029760	snoU89	snoRNA	258.417
ENSECAT00000027426	snoZ17	snoRNA	379.68
ENSECAT00000028398	snoZ17	snoRNA	1104.45
ENSECAT00000027701	snoZ196	snoRNA	5499.14
ENSECAT00000027648	snoZ30	snoRNA	61.3131
ENSECAT00000027469	snoZ39	snoRNA	397.627
ENSECAT00000027343	snoZ40	snoRNA	4473.53
ENSECAT00000027879	U3	snoRNA	2069.1
ENSECAT00000028235	U3	snoRNA	36.2354
ENSECAT00000028514	U3	snoRNA	41.9436
ENSECAT00000027747	U8	snoRNA	1441
ENSECAT00000029543	5_8S_rRNA	rRNA	365130
ENSECAT00000027214	5S_rRNA	rRNA	2093.61
ENSECAT00000027462	5S_rRNA	rRNA	42.0427
ENSECAT00000027549	5S_rRNA	rRNA	120.045
ENSECAT00000027727	5S_rRNA	rRNA	5764.6
ENSECAT00000027739	5S_rRNA	rRNA	51.3288
ENSECAT00000027826	5S_rRNA	rRNA	4.42408e+06
ENSECAT00000027918	5S_rRNA	rRNA	11.8203
ENSECAT00000028009	5S_rRNA	rRNA	68.2192
ENSECAT00000028094	5S_rRNA	rRNA	116.158
ENSECAT00000028156	5S_rRNA	rRNA	2463.49
ENSECAT00000028239	5S_rRNA	rRNA	35.6429
ENSECAT00000028382	5S_rRNA	rRNA	377.97
ENSECAT00000028410	5S_rRNA	rRNA	18927
ENSECAT00000028480	5S_rRNA	rRNA	17249
ENSECAT00000028660	5S_rRNA	rRNA	723.459
ENSECAT00000028675	5S_rRNA	rRNA	20.3057
ENSECAT00000029689	5S_rRNA	rRNA	11.7118
ENSECAT00000001547	--	pseudogene	14.2841
ENSECAT00000013637	--	pseudogene	13.5637
ENSECAT00000017584	--	pseudogene	11.1674
ENSECAT00000019706	--	pseudogene	30.6976
ENSECAT00000000003	--	protein_coding	40.7065
ENSECAT00000003835	--	protein_coding	10.985
ENSECAT00000004580	--	protein_coding	17.5333
ENSECAT00000004756	--	protein_coding	19.6298
ENSECAT00000004966	--	protein_coding	10.0842
ENSECAT00000005264	--	protein_coding	16.2075
ENSECAT00000005564	--	protein_coding	32.5509
ENSECAT00000007326	--	protein_coding	12.378
ENSECAT00000008746	--	protein_coding	14.2538
ENSECAT00000009502	--	protein_coding	13.5151
ENSECAT00000011138	--	protein_coding	10.4018
ENSECAT00000012437	--	protein_coding	29.8408
ENSECAT00000012972	--	protein_coding	13.1711
ENSECAT00000013320	--	protein_coding	10.0215
ENSECAT00000014809	--	protein_coding	121.368
ENSECAT00000014851	--	protein_coding	10.0021
ENSECAT00000014920	--	protein_coding	17.0796
ENSECAT00000015660	--	protein_coding	14.1037
ENSECAT00000016088	--	protein_coding	18.1179
ENSECAT00000016537	--	protein_coding	67.9741
ENSECAT00000016886	--	protein_coding	18.4858
ENSECAT00000016957	--	protein_coding	14.4567
ENSECAT00000017254	--	protein_coding	14.62
ENSECAT00000017494	--	protein_coding	13.386
ENSECAT00000017849	--	protein_coding	44.2009
ENSECAT00000017860	--	protein_coding	17.4814
ENSECAT00000018307	--	protein_coding	51.5083
ENSECAT00000019668	--	protein_coding	34.0878
ENSECAT00000020478	--	protein_coding	13.4028
ENSECAT00000020527	--	protein_coding	19.0112
ENSECAT00000020654	--	protein_coding	10.0577
ENSECAT00000021760	--	protein_coding	14.1548
ENSECAT00000022276	--	protein_coding	19.0768
ENSECAT00000022353	--	protein_coding	33.177
ENSECAT00000025303	--	protein_coding	17.5602
ENSECAT00000025855	--	protein_coding	12.8863
ENSECAT00000028853	--	protein_coding	14.5832
ENSECAT00000029160	--	protein_coding	18.6199
ENSECAT00000023968	ABHD14B	protein_coding	17.6384
ENSECAT00000012076	ADRA1B	protein_coding	36.0569
ENSECAT00000013926	ANXA2	protein_coding	10.3715
ENSECAT00000006684	ARHGAP27	protein_coding	16.7657
ENSECAT00000024651	ATP5G2	protein_coding	10.9998
ENSECAT00000029851	ATP6	protein_coding	101.331
ENSECAT00000029832	ATP8	protein_coding	240.639
ENSECAT00000029102	BANK1	protein_coding	11.3409
ENSECAT00000008636	CALR	protein_coding	13.3535
ENSECAT00000015756	CAVIN1	protein_coding	18.1273
ENSECAT00000017695	CENPU	protein_coding	21.5858
ENSECAT00000009679	CHD1L	protein_coding	115.439
ENSECAT00000014683	CHID1	protein_coding	10.2299
ENSECAT00000017238	CLIC4	protein_coding	117.455
ENSECAT00000007460	CLU	protein_coding	13.0615
ENSECAT00000012999	COMTD1	protein_coding	29.4961
ENSECAT00000029861	COX1	protein_coding	290.26
ENSECAT00000029837	COX2	protein_coding	248.965
ENSECAT00000029868	COX3	protein_coding	21.0591
ENSECAT00000008032	CYP2F1	protein_coding	25.5026
ENSECAT00000029845	CYTB	protein_coding	18.7669
ENSECAT00000021671	DCN	protein_coding	41.9257
ENSECAT00000009006	DEF8	protein_coding	39.3323
ENSECAT00000014918	DLC1	protein_coding	13.245
ENSECAT00000004717	DNAJC5	protein_coding	24.5335
ENSECAT00000026322	DUSP7	protein_coding	13.6911
ENSECAT00000017481	EEF1B2	protein_coding	100.515
ENSECAT00000015607	EEF1G	protein_coding	12.3414
ENSECAT00000013511	EIF3K	protein_coding	10.7824
ENSECAT00000023147	EN2	protein_coding	76.0034
ENSECAT00000019529	FAM234B	protein_coding	24.9258
ENSECAT00000012265	FBLIM1	protein_coding	25.0926
ENSECAT00000019225	FSTL1	protein_coding	12.6168
ENSECAT00000023254	GGT5	protein_coding	12.3812
ENSECAT00000006442	GPR101	protein_coding	79.1198
ENSECAT00000023878	HARS	protein_coding	10.4894
ENSECAT00000014104	HOXB7	protein_coding	23.8313
ENSECAT00000017522	HPX	protein_coding	12.4572
ENSECAT00000014305	ID1	protein_coding	16.7538
ENSECAT00000024937	ID3	protein_coding	16.8036
ENSECAT00000013559	KIF26B	protein_coding	24.2381
ENSECAT00000021692	KLHL33	protein_coding	20.1614
ENSECAT00000011244	KLHL7	protein_coding	11.1167
ENSECAT00000011932	LDHB	protein_coding	10.8947
ENSECAT00000007033	LGALS1	protein_coding	37.6996
ENSECAT00000025831	LRFN5	protein_coding	12.3525
ENSECAT00000019349	LUM	protein_coding	21.3982
ENSECAT00000019974	MCL1	protein_coding	25.3835
ENSECAT00000022835	MKS1	protein_coding	16.7781
ENSECAT00000024798	MPPE1	protein_coding	44.4395
ENSECAT00000008949	MPST	protein_coding	32.2318
ENSECAT00000019543	MYL6	protein_coding	10.64
ENSECAT00000000225	NAP1L1	protein_coding	39.1629
ENSECAT00000023647	NCL	protein_coding	13.2375
ENSECAT00000029856	ND1	protein_coding	23.1116
ENSECAT00000029834	ND2	protein_coding	27.9026
ENSECAT00000029835	ND3	protein_coding	10.9915
ENSECAT00000029858	ND4	protein_coding	10.6134
ENSECAT00000029862	ND5	protein_coding	32.7889
ENSECAT00000029841	ND6	protein_coding	23.2013
ENSECAT00000017800	NUDT14	protein_coding	15.8069
ENSECAT00000006066	NXPH4	protein_coding	49.1786
ENSECAT00000018057	PPIB	protein_coding	13.4884
ENSECAT00000017627	RAB13	protein_coding	13.2559
ENSECAT00000011529	RACGAP1	protein_coding	32.4196
ENSECAT00000002502	RHOB	protein_coding	39.6197
ENSECAT00000014713	RPL10A	protein_coding	26.3419
ENSECAT00000022577	RPL11	protein_coding	12.6601
ENSECAT00000012213	RPL13	protein_coding	21.249
ENSECAT00000016917	RPL13A	protein_coding	18.3001
ENSECAT00000028989	RPL14	protein_coding	10.4387
ENSECAT00000027008	RPL22	protein_coding	17.6774
ENSECAT00000024050	RPL27A	protein_coding	17.6242
ENSECAT00000022268	RPL3	protein_coding	12.7685
ENSECAT00000023205	RPL30	protein_coding	11.7655
ENSECAT00000020998	RPL34	protein_coding	12.5794
ENSECAT00000009553	RPL35	protein_coding	24.0175
ENSECAT00000028889	RPL37	protein_coding	33.6094
ENSECAT00000017586	RPL39	protein_coding	25.3259
ENSECAT00000025071	RPL4	protein_coding	11.3243
ENSECAT00000022616	RPL5	protein_coding	12.8179
ENSECAT00000008654	RPL8	protein_coding	18.4254
ENSECAT00000017442	RPL9	protein_coding	21.0933
ENSECAT00000006745	RPS10	protein_coding	15.8546
ENSECAT00000000294	RPS11	protein_coding	31.3706
ENSECAT00000002428	RPS12	protein_coding	19.3061
ENSECAT00000026184	RPS14	protein_coding	26.1558
ENSECAT00000005007	RPS16	protein_coding	11.6131
ENSECAT00000010091	RPS19	protein_coding	30.6729
ENSECAT00000012889	RPS20	protein_coding	64.0808
ENSECAT00000022320	RPS25	protein_coding	13.8281
ENSECAT00000026088	RPS26	protein_coding	21.1087
ENSECAT00000018174	RPS28	protein_coding	14.483
ENSECAT00000012143	RPS29	protein_coding	12.9721
ENSECAT00000009971	RPS3A	protein_coding	33.6047
ENSECAT00000011336	RPS4X	protein_coding	10.9553
ENSECAT00000017124	RPS5	protein_coding	15.8565
ENSECAT00000021588	RPS7	protein_coding	16.0709
ENSECAT00000015894	RPS8	protein_coding	18.5262
ENSECAT00000021672	RPS9	protein_coding	25.8418
ENSECAT00000020220	S100A11	protein_coding	11.3489
ENSECAT00000008288	S100A4	protein_coding	38.0042
ENSECAT00000008544	S100A6	protein_coding	24.3956
ENSECAT00000019509	SERINC3	protein_coding	13.3029
ENSECAT00000023125	SLC40A1	protein_coding	15.2853
ENSECAT00000014801	SPARC	protein_coding	20.2863
ENSECAT00000012352	TIMP2	protein_coding	10.7155
ENSECAT00000018983	TMEM184A	protein_coding	11.2591
ENSECAT00000009354	TMSB4X	protein_coding	15.4451
ENSECAT00000023888	TPM4	protein_coding	10.204
ENSECAT00000019534	TPT1	protein_coding	74.203
ENSECAT00000016197	TTPAL	protein_coding	144.692
ENSECAT00000021908	UBA52	protein_coding	14.3269
ENSECAT00000023514	USP22	protein_coding	68.1296
ENSECAT00000006522	VIM	protein_coding	37.9777
ENSECAT00000022593	ZNF157	protein_coding	33.6107
ENSECAT00000002558	--	processed_pseudogene	44.5388
ENSECAT00000006049	--	processed_pseudogene	48.1749
ENSECAT00000029833	--	Mt_tRNA	423.35
ENSECAT00000029836	--	Mt_tRNA	3258.51
ENSECAT00000029839	--	Mt_tRNA	6688.14
ENSECAT00000029843	--	Mt_tRNA	8764.63
ENSECAT00000029844	--	Mt_tRNA	957.802
ENSECAT00000029846	--	Mt_tRNA	1838.43
ENSECAT00000029847	--	Mt_tRNA	105753
ENSECAT00000029848	--	Mt_tRNA	37179.8
ENSECAT00000029850	--	Mt_tRNA	2822.96
ENSECAT00000029852	--	Mt_tRNA	513.12
ENSECAT00000029853	--	Mt_tRNA	154.721
ENSECAT00000029854	--	Mt_tRNA	104.612
ENSECAT00000029857	--	Mt_tRNA	1574.11
ENSECAT00000029860	--	Mt_tRNA	907.763
ENSECAT00000029863	--	Mt_tRNA	27767.4
ENSECAT00000029864	--	Mt_tRNA	181.502
ENSECAT00000029865	--	Mt_tRNA	1448.93
ENSECAT00000029866	--	Mt_tRNA	47.5915
ENSECAT00000029867	--	Mt_tRNA	96.6445
ENSECAT00000029840	--	Mt_rRNA	2815.49
ENSECAT00000029849	--	Mt_rRNA	876.613
ENSECAT00000027277	7SK	misc_RNA	336.803
ENSECAT00000028237	7SK	misc_RNA	41.7317
ENSECAT00000029297	Bacteria_small_SRP	misc_RNA	40.3417
ENSECAT00000028079	RNase_MRP	misc_RNA	3519.3
ENSECAT00000029410	RNaseP_nuc	misc_RNA	49862.2
ENSECAT00000028109	Telomerase-vert	misc_RNA	122.952
ENSECAT00000028623	Vault	misc_RNA	127828
ENSECAT00000027406	Y_RNA	misc_RNA	15.7898
ENSECAT00000027414	Y_RNA	misc_RNA	8082.87
ENSECAT00000027685	Y_RNA	misc_RNA	896.814
ENSECAT00000027933	Y_RNA	misc_RNA	70666.3
ENSECAT00000029482	Y_RNA	misc_RNA	90209.2
ENSECAT00000027835	eca-let-7a-2	miRNA	2112.7
ENSECAT00000027672	eca-let-7f	miRNA	1061.63
ENSECAT00000028042	eca-let-7g	miRNA	10.3214
ENSECAT00000028165	eca-mir-100	miRNA	68.6419
ENSECAT00000027199	eca-mir-107a	miRNA	13.3862
ENSECAT00000028342	eca-mir-10a	miRNA	14.4047
ENSECAT00000028331	eca-mir-125a	miRNA	28.0794
ENSECAT00000028247	eca-mir-125b	miRNA	12.9642
ENSECAT00000028329	eca-mir-1282	miRNA	13.6017
ENSECAT00000027661	eca-mir-1296	miRNA	15.5019
ENSECAT00000027616	eca-mir-146b	miRNA	12.3279
ENSECAT00000028275	eca-mir-148a	miRNA	11.0747
ENSECAT00000028537	eca-mir-151	miRNA	32.7187
ENSECAT00000028091	eca-mir-217	miRNA	10.6464
ENSECAT00000028005	eca-mir-221	miRNA	31.8351
ENSECAT00000027987	eca-mir-222	miRNA	121.365
ENSECAT00000027668	eca-mir-23a	miRNA	10.1185
ENSECAT00000028409	eca-mir-24-1	miRNA	21.9022
ENSECAT00000028375	eca-mir-26a	miRNA	20.7606
ENSECAT00000027270	eca-mir-28	miRNA	16.1603
ENSECAT00000027635	eca-mir-30d	miRNA	60.5447
ENSECAT00000027453	eca-mir-34a	miRNA	18.8632
ENSECAT00000027372	eca-mir-503	miRNA	45.3843
ENSECAT00000029578	eca-mir-664	miRNA	87.3749
ENSECAT00000028216	eca-mir-885	miRNA	31.0594
ENSECAT00000028501	eca-mir-93	miRNA	36.3917
ENSECAT00000027255	eca-mir-99a-2	miRNA	15.4777
ENSECAT00000027444	eca-mir-99b	miRNA	14.8622
