# Supplementary material for: Equine Adipose-Derived Mesenchymal Stromal Cells Release Extracellular Vesicles Enclosing Different Subsets of Small RNAs
Source: Stem Cells Int. 2019 Mar 18;2019:4957806. doi: 10.1155/2019/4957806 (PMC6442443; doi:10.1155/2019/4957806)
Supplement: Supplementary 2 — Additional File 2: Gene Ontology and pathway analysis full results. [file 4957806.f2.xlsx]

## Sheet: CC
This file contains the Gene Ontology and Pathwahy analysis performed with strings
#pathway ID	pathway description	observed gene count	false discovery rate	matching proteins in your network (IDs)	matching proteins in your network (labels)
GO.0031967	organelle envelope	12	8.71e-19	ENSECAP00000003922,ENSECAP00000005450,ENSECAP00000006408,ENSECAP00000023102,ENSECAP00000023103,ENSECAP00000023105,ENSECAP00000023106,ENSECAP00000023108,ENSECAP00000023109,ENSECAP00000023111,ENSECAP00000023112,ENSECAP00000023113	CLU,MT-ATP6,MT-CO2,MT-CO3,MT-CYB,MT-ND1,MT-ND3,MT-ND4,MT-ND5,MT-ND6,ND1,S100A6
GO.0031966	mitochondrial membrane	11	1.27e-18	ENSECAP00000003922,ENSECAP00000005450,ENSECAP00000023102,ENSECAP00000023103,ENSECAP00000023105,ENSECAP00000023106,ENSECAP00000023108,ENSECAP00000023109,ENSECAP00000023111,ENSECAP00000023112,ENSECAP00000023113	CLU,MT-ATP6,MT-CO2,MT-CO3,MT-CYB,MT-ND1,MT-ND3,MT-ND4,MT-ND5,MT-ND6,ND1
GO.0070469	respiratory chain	10	2.08e-18	ENSECAP00000003922,ENSECAP00000023101,ENSECAP00000023102,ENSECAP00000023103,ENSECAP00000023106,ENSECAP00000023108,ENSECAP00000023109,ENSECAP00000023111,ENSECAP00000023112,ENSECAP00000023113	MT-CO2,MT-CO3,MT-CYB,MT-ND1,MT-ND2,MT-ND3,MT-ND4,MT-ND5,MT-ND6,ND1
GO.0005740	mitochondrial envelope	11	2.14e-18	ENSECAP00000003922,ENSECAP00000005450,ENSECAP00000023102,ENSECAP00000023103,ENSECAP00000023105,ENSECAP00000023106,ENSECAP00000023108,ENSECAP00000023109,ENSECAP00000023111,ENSECAP00000023112,ENSECAP00000023113	CLU,MT-ATP6,MT-CO2,MT-CO3,MT-CYB,MT-ND1,MT-ND3,MT-ND4,MT-ND5,MT-ND6,ND1
GO.0005743	mitochondrial inner membrane	9	2.25e-18	ENSECAP00000003922,ENSECAP00000023102,ENSECAP00000023103,ENSECAP00000023105,ENSECAP00000023106,ENSECAP00000023109,ENSECAP00000023111,ENSECAP00000023112,ENSECAP00000023113	MT-ATP6,MT-CO2,MT-CO3,MT-CYB,MT-ND1,MT-ND3,MT-ND4,MT-ND5,ND1
GO.0098803	respiratory chain complex	9	2.25e-18	ENSECAP00000003922,ENSECAP00000023101,ENSECAP00000023102,ENSECAP00000023103,ENSECAP00000023106,ENSECAP00000023109,ENSECAP00000023111,ENSECAP00000023112,ENSECAP00000023113	MT-CO2,MT-CO3,MT-CYB,MT-ND1,MT-ND2,MT-ND3,MT-ND4,MT-ND5,ND1
GO.0043229	intracellular organelle	17	9.21e-18	ENSECAP00000000003,ENSECAP00000003922,ENSECAP00000005450,ENSECAP00000006408,ENSECAP00000007110,ENSECAP00000008853,ENSECAP00000012558,ENSECAP00000019820,ENSECAP00000023102,ENSECAP00000023103,ENSECAP00000023105,ENSECAP00000023106,ENSECAP00000023108,ENSECAP00000023109,ENSECAP00000023111,ENSECAP00000023112,ENSECAP00000023113	CLU,EEF1G,MT-ATP6,MT-CO2,MT-CO3,MT-CYB,MT-ND1,MT-ND3,MT-ND4,MT-ND5,MT-ND6,ND1,RPLP2,RPS4,S100A6,TMSB4X,TPM4
GO.0032991	macromolecular complex	13	8.4e-17	ENSECAP00000000003,ENSECAP00000003922,ENSECAP00000005450,ENSECAP00000008853,ENSECAP00000023101,ENSECAP00000023102,ENSECAP00000023103,ENSECAP00000023105,ENSECAP00000023106,ENSECAP00000023109,ENSECAP00000023111,ENSECAP00000023112,ENSECAP00000023113	CLU,MT-ATP6,MT-CO2,MT-CO3,MT-CYB,MT-ND1,MT-ND2,MT-ND3,MT-ND4,MT-ND5,ND1,RPLP2,RPS4
GO.0098796	membrane protein complex	10	1.68e-16	ENSECAP00000003922,ENSECAP00000023101,ENSECAP00000023102,ENSECAP00000023103,ENSECAP00000023105,ENSECAP00000023106,ENSECAP00000023109,ENSECAP00000023111,ENSECAP00000023112,ENSECAP00000023113	MT-ATP6,MT-CO2,MT-CO3,MT-CYB,MT-ND1,MT-ND2,MT-ND3,MT-ND4,MT-ND5,ND1
GO.0098800	inner mitochondrial membrane protein complex	8	1.68e-16	ENSECAP00000003922,ENSECAP00000023101,ENSECAP00000023102,ENSECAP00000023103,ENSECAP00000023105,ENSECAP00000023107,ENSECAP00000023109,ENSECAP00000023111	MT-ATP6,MT-CO1,MT-ND1,MT-ND2,MT-ND3,MT-ND4,MT-ND5,ND1
GO.0044444	cytoplasmic part	15	5.64e-16	ENSECAP00000000003,ENSECAP00000003922,ENSECAP00000005450,ENSECAP00000007110,ENSECAP00000008853,ENSECAP00000012558,ENSECAP00000023102,ENSECAP00000023103,ENSECAP00000023105,ENSECAP00000023106,ENSECAP00000023108,ENSECAP00000023109,ENSECAP00000023111,ENSECAP00000023112,ENSECAP00000023113	CLU,EEF1G,MT-ATP6,MT-CO2,MT-CO3,MT-CYB,MT-ND1,MT-ND3,MT-ND4,MT-ND5,MT-ND6,ND1,RPLP2,RPS4,TMSB4X
GO.0005739	mitochondrion	11	6.21e-16	ENSECAP00000003922,ENSECAP00000005450,ENSECAP00000023102,ENSECAP00000023103,ENSECAP00000023105,ENSECAP00000023106,ENSECAP00000023108,ENSECAP00000023109,ENSECAP00000023111,ENSECAP00000023112,ENSECAP00000023113	CLU,MT-ATP6,MT-CO2,MT-CO3,MT-CYB,MT-ND1,MT-ND3,MT-ND4,MT-ND5,MT-ND6,ND1
GO.0044446	intracellular organelle part	13	8.57e-16	ENSECAP00000003922,ENSECAP00000005450,ENSECAP00000006408,ENSECAP00000008853,ENSECAP00000023102,ENSECAP00000023103,ENSECAP00000023105,ENSECAP00000023106,ENSECAP00000023108,ENSECAP00000023109,ENSECAP00000023111,ENSECAP00000023112,ENSECAP00000023113	CLU,MT-ATP6,MT-CO2,MT-CO3,MT-CYB,MT-ND1,MT-ND3,MT-ND4,MT-ND5,MT-ND6,ND1,RPS4,S100A6
GO.0005737	cytoplasm	16	2.2e-15	ENSECAP00000000003,ENSECAP00000003922,ENSECAP00000005450,ENSECAP00000007110,ENSECAP00000008853,ENSECAP00000012558,ENSECAP00000019820,ENSECAP00000023102,ENSECAP00000023103,ENSECAP00000023105,ENSECAP00000023106,ENSECAP00000023108,ENSECAP00000023109,ENSECAP00000023111,ENSECAP00000023112,ENSECAP00000023113	CLU,EEF1G,MT-ATP6,MT-CO2,MT-CO3,MT-CYB,MT-ND1,MT-ND3,MT-ND4,MT-ND5,MT-ND6,ND1,RPLP2,RPS4,TMSB4X,TPM4
GO.0016021	integral component of membrane	13	3.5e-15	ENSECAP00000003922,ENSECAP00000023101,ENSECAP00000023102,ENSECAP00000023103,ENSECAP00000023104,ENSECAP00000023105,ENSECAP00000023106,ENSECAP00000023107,ENSECAP00000023108,ENSECAP00000023109,ENSECAP00000023111,ENSECAP00000023112,ENSECAP00000023113	MT-ATP6,MT-ATP8,MT-CO1,MT-CO2,MT-CO3,MT-CYB,MT-ND1,MT-ND2,MT-ND3,MT-ND4,MT-ND5,MT-ND6,ND1
GO.0043226	organelle	15	9.23e-15	ENSECAP00000000003,ENSECAP00000003922,ENSECAP00000005450,ENSECAP00000006408,ENSECAP00000007110,ENSECAP00000008853,ENSECAP00000012558,ENSECAP00000019820,ENSECAP00000023102,ENSECAP00000023103,ENSECAP00000023108,ENSECAP00000023109,ENSECAP00000023111,ENSECAP00000023112,ENSECAP00000023113	CLU,EEF1G,MT-CO3,MT-CYB,MT-ND1,MT-ND3,MT-ND4,MT-ND5,MT-ND6,ND1,RPLP2,RPS4,S100A6,TMSB4X,TPM4
GO.0043231	intracellular membrane-bounded organelle	14	1.19e-14	ENSECAP00000003922,ENSECAP00000005450,ENSECAP00000006408,ENSECAP00000007110,ENSECAP00000012558,ENSECAP00000023102,ENSECAP00000023103,ENSECAP00000023105,ENSECAP00000023106,ENSECAP00000023108,ENSECAP00000023109,ENSECAP00000023111,ENSECAP00000023112,ENSECAP00000023113	CLU,EEF1G,MT-ATP6,MT-CO2,MT-CO3,MT-CYB,MT-ND1,MT-ND3,MT-ND4,MT-ND5,MT-ND6,ND1,S100A6,TMSB4X
GO.0005746	mitochondrial respiratory chain	7	1.3e-14	ENSECAP00000003922,ENSECAP00000023101,ENSECAP00000023102,ENSECAP00000023103,ENSECAP00000023107,ENSECAP00000023109,ENSECAP00000023111	MT-CO1,MT-ND1,MT-ND2,MT-ND3,MT-ND4,MT-ND5,ND1
GO.1990204	oxidoreductase complex	7	1.3e-14	ENSECAP00000003922,ENSECAP00000023101,ENSECAP00000023102,ENSECAP00000023103,ENSECAP00000023109,ENSECAP00000023111,ENSECAP00000023113	MT-CYB,MT-ND1,MT-ND2,MT-ND3,MT-ND4,MT-ND5,ND1
GO.0016020	membrane	14	1.53e-14	ENSECAP00000003922,ENSECAP00000005450,ENSECAP00000006408,ENSECAP00000008853,ENSECAP00000012558,ENSECAP00000023102,ENSECAP00000023103,ENSECAP00000023105,ENSECAP00000023106,ENSECAP00000023108,ENSECAP00000023109,ENSECAP00000023111,ENSECAP00000023112,ENSECAP00000023113	CLU,EEF1G,MT-ATP6,MT-CO2,MT-CO3,MT-CYB,MT-ND1,MT-ND3,MT-ND4,MT-ND5,MT-ND6,ND1,RPS4,S100A6
GO.0044424	intracellular part	15	1.72e-13	ENSECAP00000000003,ENSECAP00000003922,ENSECAP00000007110,ENSECAP00000008853,ENSECAP00000012558,ENSECAP00000019820,ENSECAP00000023102,ENSECAP00000023103,ENSECAP00000023105,ENSECAP00000023106,ENSECAP00000023108,ENSECAP00000023109,ENSECAP00000023111,ENSECAP00000023112,ENSECAP00000023113	EEF1G,MT-ATP6,MT-CO2,MT-CO3,MT-CYB,MT-ND1,MT-ND3,MT-ND4,MT-ND5,MT-ND6,ND1,RPLP2,RPS4,TMSB4X,TPM4
GO.0005622	intracellular	15	2.73e-13	ENSECAP00000000003,ENSECAP00000003922,ENSECAP00000007110,ENSECAP00000008853,ENSECAP00000012558,ENSECAP00000019820,ENSECAP00000023102,ENSECAP00000023103,ENSECAP00000023105,ENSECAP00000023106,ENSECAP00000023108,ENSECAP00000023109,ENSECAP00000023111,ENSECAP00000023112,ENSECAP00000023113	EEF1G,MT-ATP6,MT-CO2,MT-CO3,MT-CYB,MT-ND1,MT-ND3,MT-ND4,MT-ND5,MT-ND6,ND1,RPLP2,RPS4,TMSB4X,TPM4
GO.0043227	membrane-bounded organelle	13	7.42e-13	ENSECAP00000003922,ENSECAP00000005450,ENSECAP00000006408,ENSECAP00000007110,ENSECAP00000008853,ENSECAP00000012558,ENSECAP00000023102,ENSECAP00000023103,ENSECAP00000023108,ENSECAP00000023109,ENSECAP00000023111,ENSECAP00000023112,ENSECAP00000023113	CLU,EEF1G,MT-CO3,MT-CYB,MT-ND1,MT-ND3,MT-ND4,MT-ND5,MT-ND6,ND1,RPS4,S100A6,TMSB4X
GO.0044425	membrane part	12	9.38e-13	ENSECAP00000003922,ENSECAP00000006408,ENSECAP00000023101,ENSECAP00000023102,ENSECAP00000023103,ENSECAP00000023105,ENSECAP00000023106,ENSECAP00000023108,ENSECAP00000023109,ENSECAP00000023111,ENSECAP00000023112,ENSECAP00000023113	MT-ATP6,MT-CO2,MT-CO3,MT-CYB,MT-ND1,MT-ND2,MT-ND3,MT-ND4,MT-ND5,MT-ND6,ND1,S100A6
GO.0005747	mitochondrial respiratory chain complex I	6	1.31e-12	ENSECAP00000003922,ENSECAP00000023101,ENSECAP00000023102,ENSECAP00000023103,ENSECAP00000023109,ENSECAP00000023111	MT-ND1,MT-ND2,MT-ND3,MT-ND4,MT-ND5,ND1
GO.0005623	cell	15	3.62e-12	ENSECAP00000000003,ENSECAP00000003922,ENSECAP00000007110,ENSECAP00000008853,ENSECAP00000012558,ENSECAP00000019820,ENSECAP00000023102,ENSECAP00000023103,ENSECAP00000023105,ENSECAP00000023106,ENSECAP00000023108,ENSECAP00000023109,ENSECAP00000023111,ENSECAP00000023112,ENSECAP00000023113	EEF1G,MT-ATP6,MT-CO2,MT-CO3,MT-CYB,MT-ND1,MT-ND3,MT-ND4,MT-ND5,MT-ND6,ND1,RPLP2,RPS4,TMSB4X,TPM4
GO.0005575	cellular_component	15	3.51e-10	ENSECAP00000000003,ENSECAP00000003922,ENSECAP00000007110,ENSECAP00000008853,ENSECAP00000009754,ENSECAP00000012558,ENSECAP00000017861,ENSECAP00000019820,ENSECAP00000023102,ENSECAP00000023103,ENSECAP00000023108,ENSECAP00000023109,ENSECAP00000023111,ENSECAP00000023112,ENSECAP00000023113	DCN,EEF1G,MT-CO3,MT-CYB,MT-ND1,MT-ND3,MT-ND4,MT-ND5,MT-ND6,ND1,RPLP2,RPS4,TIMP2,TMSB4X,TPM4
GO.0070062	extracellular exosome	6	1.32e-07	ENSECAP00000005450,ENSECAP00000006408,ENSECAP00000008853,ENSECAP00000012558,ENSECAP00000023105,ENSECAP00000023106	CLU,EEF1G,MT-ATP6,MT-CO2,RPS4,S100A6
GO.0070069	cytochrome complex	3	2.6e-06	ENSECAP00000023106,ENSECAP00000023112,ENSECAP00000023113	MT-CO2,MT-CO3,MT-CYB
GO.0043232	intracellular non-membrane-bounded organelle	4	6.54e-05	ENSECAP00000000003,ENSECAP00000007110,ENSECAP00000008853,ENSECAP00000019820	RPLP2,RPS4,TMSB4X,TPM4
GO.0044421	extracellular region part	6	0.000117	ENSECAP00000006408,ENSECAP00000008853,ENSECAP00000012558,ENSECAP00000017861,ENSECAP00000023105,ENSECAP00000023106	DCN,EEF1G,MT-ATP6,MT-CO2,RPS4,S100A6
GO.0005576	extracellular region	7	0.000152	ENSECAP00000006408,ENSECAP00000008853,ENSECAP00000009754,ENSECAP00000012558,ENSECAP00000017861,ENSECAP00000023105,ENSECAP00000023106	DCN,EEF1G,MT-ATP6,MT-CO2,RPS4,S100A6,TIMP2
GO.0005840	ribosome	2	0.000299	ENSECAP00000000003,ENSECAP00000008853	RPLP2,RPS4
GO.0045263	proton-transporting ATP synthase complex, coupling factor F(o)	2	0.000299	ENSECAP00000023104,ENSECAP00000023105	MT-ATP6,MT-ATP8
GO.0045277	respiratory chain complex IV	2	0.000299	ENSECAP00000023106,ENSECAP00000023112	MT-CO2,MT-CO3
GO.0005634	nucleus	4	0.000975	ENSECAP00000005450,ENSECAP00000006408,ENSECAP00000007110,ENSECAP00000012558	CLU,EEF1G,S100A6,TMSB4X
GO.0005829	cytosol	3	0.0019	ENSECAP00000005450,ENSECAP00000006408,ENSECAP00000007110	CLU,S100A6,TMSB4X
GO.0012505	endomembrane system	3	0.00725	ENSECAP00000005450,ENSECAP00000006408,ENSECAP00000012558	CLU,EEF1G,S100A6
GO.0048471	perinuclear region of cytoplasm	2	0.00954	ENSECAP00000005450,ENSECAP00000006408	CLU,S100A6
GO.0005856	cytoskeleton	2	0.0117	ENSECAP00000007110,ENSECAP00000019820	TMSB4X,TPM4
GO.0031012	extracellular matrix	2	0.0167	ENSECAP00000005450,ENSECAP00000017861	CLU,DCN
GO.0005783	endoplasmic reticulum	2	0.0193	ENSECAP00000005450,ENSECAP00000012558	CLU,EEF1G
GO.0042995	cell projection	2	0.022	ENSECAP00000005450,ENSECAP00000006408	CLU,S100A6

## Sheet: BP
#pathway ID	pathway description	observed gene count	false discovery rate	matching proteins in your network (IDs)	matching proteins in your network (labels)
GO.0008152	metabolic process	18	1.13e-14	ENSECAP00000000003,ENSECAP00000003922,ENSECAP00000005450,ENSECAP00000008853,ENSECAP00000012558,ENSECAP00000017861,ENSECAP00000023101,ENSECAP00000023102,ENSECAP00000023103,ENSECAP00000023104,ENSECAP00000023105,ENSECAP00000023106,ENSECAP00000023107,ENSECAP00000023108,ENSECAP00000023109,ENSECAP00000023111,ENSECAP00000023112,ENSECAP00000023113	CLU,DCN,EEF1G,MT-ATP6,MT-ATP8,MT-CO1,MT-CO2,MT-CO3,MT-CYB,MT-ND1,MT-ND2,MT-ND3,MT-ND4,MT-ND5,MT-ND6,ND1,RPLP2,RPS4
GO.1901564	organonitrogen compound metabolic process	11	5.76e-14	ENSECAP00000000003,ENSECAP00000008853,ENSECAP00000012558,ENSECAP00000017861,ENSECAP00000023101,ENSECAP00000023103,ENSECAP00000023104,ENSECAP00000023105,ENSECAP00000023107,ENSECAP00000023109,ENSECAP00000023113	DCN,EEF1G,MT-ATP6,MT-ATP8,MT-CO1,MT-CYB,MT-ND2,MT-ND4,MT-ND5,RPLP2,RPS4
GO.0044710	single-organism metabolic process	14	2.26e-13	ENSECAP00000003922,ENSECAP00000017861,ENSECAP00000023101,ENSECAP00000023102,ENSECAP00000023103,ENSECAP00000023104,ENSECAP00000023105,ENSECAP00000023106,ENSECAP00000023107,ENSECAP00000023108,ENSECAP00000023109,ENSECAP00000023111,ENSECAP00000023112,ENSECAP00000023113	DCN,MT-ATP6,MT-ATP8,MT-CO1,MT-CO2,MT-CO3,MT-CYB,MT-ND1,MT-ND2,MT-ND3,MT-ND4,MT-ND5,MT-ND6,ND1
GO.0008150	biological_process	19	4.95e-13	ENSECAP00000000003,ENSECAP00000003922,ENSECAP00000005450,ENSECAP00000007110,ENSECAP00000008853,ENSECAP00000009754,ENSECAP00000012558,ENSECAP00000017861,ENSECAP00000023101,ENSECAP00000023102,ENSECAP00000023103,ENSECAP00000023104,ENSECAP00000023105,ENSECAP00000023106,ENSECAP00000023107,ENSECAP00000023108,ENSECAP00000023109,ENSECAP00000023111,ENSECAP00000023113	CLU,DCN,EEF1G,MT-ATP6,MT-ATP8,MT-CO1,MT-CO2,MT-CYB,MT-ND1,MT-ND2,MT-ND3,MT-ND4,MT-ND5,MT-ND6,ND1,RPLP2,RPS4,TIMP2,TMSB4X
GO.0055114	oxidation-reduction process	11	7.01e-13	ENSECAP00000003922,ENSECAP00000023101,ENSECAP00000023102,ENSECAP00000023103,ENSECAP00000023106,ENSECAP00000023107,ENSECAP00000023108,ENSECAP00000023109,ENSECAP00000023111,ENSECAP00000023112,ENSECAP00000023113	MT-CO1,MT-CO2,MT-CO3,MT-CYB,MT-ND1,MT-ND2,MT-ND3,MT-ND4,MT-ND5,MT-ND6,ND1
GO.0044237	cellular metabolic process	14	2.58e-12	ENSECAP00000000003,ENSECAP00000005450,ENSECAP00000008853,ENSECAP00000012558,ENSECAP00000017861,ENSECAP00000023101,ENSECAP00000023103,ENSECAP00000023104,ENSECAP00000023105,ENSECAP00000023106,ENSECAP00000023107,ENSECAP00000023109,ENSECAP00000023112,ENSECAP00000023113	CLU,DCN,EEF1G,MT-ATP6,MT-ATP8,MT-CO1,MT-CO2,MT-CO3,MT-CYB,MT-ND2,MT-ND4,MT-ND5,RPLP2,RPS4
GO.1901135	carbohydrate derivative metabolic process	8	2.41e-11	ENSECAP00000017861,ENSECAP00000023101,ENSECAP00000023103,ENSECAP00000023104,ENSECAP00000023105,ENSECAP00000023107,ENSECAP00000023109,ENSECAP00000023113	DCN,MT-ATP6,MT-ATP8,MT-CO1,MT-CYB,MT-ND2,MT-ND4,MT-ND5
GO.1902600	hydrogen ion transmembrane transport	6	5.86e-11	ENSECAP00000023104,ENSECAP00000023105,ENSECAP00000023106,ENSECAP00000023107,ENSECAP00000023112,ENSECAP00000023113	MT-ATP6,MT-ATP8,MT-CO1,MT-CO2,MT-CO3,MT-CYB
GO.0034641	cellular nitrogen compound metabolic process	10	1.22e-10	ENSECAP00000000003,ENSECAP00000008853,ENSECAP00000012558,ENSECAP00000023101,ENSECAP00000023103,ENSECAP00000023104,ENSECAP00000023105,ENSECAP00000023107,ENSECAP00000023109,ENSECAP00000023113	EEF1G,MT-ATP6,MT-ATP8,MT-CO1,MT-CYB,MT-ND2,MT-ND4,MT-ND5,RPLP2,RPS4
GO.0046034	ATP metabolic process	7	1.22e-10	ENSECAP00000023101,ENSECAP00000023103,ENSECAP00000023104,ENSECAP00000023105,ENSECAP00000023107,ENSECAP00000023109,ENSECAP00000023113	MT-ATP6,MT-ATP8,MT-CO1,MT-CYB,MT-ND2,MT-ND4,MT-ND5
GO.0022900	electron transport chain	6	1.31e-10	ENSECAP00000023101,ENSECAP00000023103,ENSECAP00000023106,ENSECAP00000023109,ENSECAP00000023112,ENSECAP00000023113	MT-CO2,MT-CO3,MT-CYB,MT-ND2,MT-ND4,MT-ND5
GO.0045333	cellular respiration	6	1.31e-10	ENSECAP00000023101,ENSECAP00000023103,ENSECAP00000023107,ENSECAP00000023109,ENSECAP00000023112,ENSECAP00000023113	MT-CO1,MT-CO3,MT-CYB,MT-ND2,MT-ND4,MT-ND5
GO.0044699	single-organism process	15	1.51e-10	ENSECAP00000003922,ENSECAP00000008853,ENSECAP00000017861,ENSECAP00000023101,ENSECAP00000023102,ENSECAP00000023103,ENSECAP00000023104,ENSECAP00000023105,ENSECAP00000023106,ENSECAP00000023107,ENSECAP00000023108,ENSECAP00000023109,ENSECAP00000023111,ENSECAP00000023112,ENSECAP00000023113	DCN,MT-ATP6,MT-ATP8,MT-CO1,MT-CO2,MT-CO3,MT-CYB,MT-ND1,MT-ND2,MT-ND3,MT-ND4,MT-ND5,MT-ND6,ND1,RPS4
GO.0006091	generation of precursor metabolites and energy	7	5.99e-10	ENSECAP00000023101,ENSECAP00000023103,ENSECAP00000023106,ENSECAP00000023107,ENSECAP00000023109,ENSECAP00000023112,ENSECAP00000023113	MT-CO1,MT-CO2,MT-CO3,MT-CYB,MT-ND2,MT-ND4,MT-ND5
GO.0044238	primary metabolic process	12	1.1e-09	ENSECAP00000000003,ENSECAP00000005450,ENSECAP00000008853,ENSECAP00000012558,ENSECAP00000017861,ENSECAP00000023101,ENSECAP00000023103,ENSECAP00000023104,ENSECAP00000023105,ENSECAP00000023107,ENSECAP00000023109,ENSECAP00000023113	CLU,DCN,EEF1G,MT-ATP6,MT-ATP8,MT-CO1,MT-CYB,MT-ND2,MT-ND4,MT-ND5,RPLP2,RPS4
GO.0071704	organic substance metabolic process	12	2.14e-09	ENSECAP00000000003,ENSECAP00000005450,ENSECAP00000008853,ENSECAP00000012558,ENSECAP00000017861,ENSECAP00000023101,ENSECAP00000023103,ENSECAP00000023104,ENSECAP00000023105,ENSECAP00000023107,ENSECAP00000023109,ENSECAP00000023113	CLU,DCN,EEF1G,MT-ATP6,MT-ATP8,MT-CO1,MT-CYB,MT-ND2,MT-ND4,MT-ND5,RPLP2,RPS4
GO.0006119	oxidative phosphorylation	5	8.99e-09	ENSECAP00000023101,ENSECAP00000023103,ENSECAP00000023107,ENSECAP00000023109,ENSECAP00000023113	MT-CO1,MT-CYB,MT-ND2,MT-ND4,MT-ND5
GO.0022904	respiratory electron transport chain	5	8.99e-09	ENSECAP00000023101,ENSECAP00000023103,ENSECAP00000023109,ENSECAP00000023112,ENSECAP00000023113	MT-CO3,MT-CYB,MT-ND2,MT-ND4,MT-ND5
GO.0044281	small molecule metabolic process	8	8.99e-09	ENSECAP00000017861,ENSECAP00000023101,ENSECAP00000023103,ENSECAP00000023104,ENSECAP00000023105,ENSECAP00000023107,ENSECAP00000023109,ENSECAP00000023113	DCN,MT-ATP6,MT-ATP8,MT-CO1,MT-CYB,MT-ND2,MT-ND4,MT-ND5
GO.0009987	cellular process	12	5.62e-08	ENSECAP00000000003,ENSECAP00000008853,ENSECAP00000012558,ENSECAP00000017861,ENSECAP00000023101,ENSECAP00000023103,ENSECAP00000023104,ENSECAP00000023105,ENSECAP00000023106,ENSECAP00000023107,ENSECAP00000023109,ENSECAP00000023113	DCN,EEF1G,MT-ATP6,MT-ATP8,MT-CO1,MT-CO2,MT-CYB,MT-ND2,MT-ND4,MT-ND5,RPLP2,RPS4
GO.0042773	ATP synthesis coupled electron transport	4	8.45e-07	ENSECAP00000023101,ENSECAP00000023103,ENSECAP00000023109,ENSECAP00000023113	MT-CYB,MT-ND2,MT-ND4,MT-ND5
GO.1901566	organonitrogen compound biosynthetic process	5	9.31e-07	ENSECAP00000000003,ENSECAP00000008853,ENSECAP00000012558,ENSECAP00000023104,ENSECAP00000023105	EEF1G,MT-ATP6,MT-ATP8,RPLP2,RPS4
GO.0044763	single-organism cellular process	10	1.76e-06	ENSECAP00000017861,ENSECAP00000023101,ENSECAP00000023103,ENSECAP00000023104,ENSECAP00000023105,ENSECAP00000023106,ENSECAP00000023107,ENSECAP00000023109,ENSECAP00000023112,ENSECAP00000023113	DCN,MT-ATP6,MT-ATP8,MT-CO1,MT-CO2,MT-CO3,MT-CYB,MT-ND2,MT-ND4,MT-ND5
GO.0044765	single-organism transport	7	1.84e-06	ENSECAP00000005450,ENSECAP00000023104,ENSECAP00000023105,ENSECAP00000023106,ENSECAP00000023107,ENSECAP00000023112,ENSECAP00000023113	CLU,MT-ATP6,MT-ATP8,MT-CO1,MT-CO2,MT-CO3,MT-CYB
GO.0044271	cellular nitrogen compound biosynthetic process	5	1.48e-05	ENSECAP00000000003,ENSECAP00000008853,ENSECAP00000012558,ENSECAP00000023104,ENSECAP00000023105	EEF1G,MT-ATP6,MT-ATP8,RPLP2,RPS4
GO.0042775	mitochondrial ATP synthesis coupled electron transport	3	1.91e-05	ENSECAP00000023101,ENSECAP00000023109,ENSECAP00000023113	MT-CYB,MT-ND2,MT-ND4
GO.0006412	translation	3	6.9e-05	ENSECAP00000000003,ENSECAP00000008853,ENSECAP00000012558	EEF1G,RPLP2,RPS4
GO.0044267	cellular protein metabolic process	5	6.9e-05	ENSECAP00000000003,ENSECAP00000005450,ENSECAP00000008853,ENSECAP00000012558,ENSECAP00000017861	CLU,DCN,EEF1G,RPLP2,RPS4
GO.0071822	protein complex subunit organization	3	0.00186	ENSECAP00000005450,ENSECAP00000007110,ENSECAP00000023112	CLU,MT-CO3,TMSB4X
GO.0006120	mitochondrial electron transport, NADH to ubiquinone	2	0.00206	ENSECAP00000023101,ENSECAP00000023109	MT-ND2,MT-ND4
GO.0009060	aerobic respiration	2	0.00206	ENSECAP00000023107,ENSECAP00000023112	MT-CO1,MT-CO3
GO.0015986	ATP synthesis coupled proton transport	2	0.00206	ENSECAP00000023104,ENSECAP00000023105	MT-ATP6,MT-ATP8
GO.0006414	translational elongation	2	0.00511	ENSECAP00000000003,ENSECAP00000012558	EEF1G,RPLP2
GO.0034250	positive regulation of cellular amide metabolic process	2	0.00511	ENSECAP00000005450,ENSECAP00000008853	CLU,RPS4
GO.0010467	gene expression	3	0.0103	ENSECAP00000000003,ENSECAP00000008853,ENSECAP00000012558	EEF1G,RPLP2,RPS4
GO.0050794	regulation of cellular process	5	0.0132	ENSECAP00000005450,ENSECAP00000007110,ENSECAP00000008853,ENSECAP00000009754,ENSECAP00000017861	CLU,DCN,RPS4,TIMP2,TMSB4X
GO.0031331	positive regulation of cellular catabolic process	2	0.0147	ENSECAP00000005450,ENSECAP00000017861	CLU,DCN
GO.0043623	cellular protein complex assembly	2	0.0215	ENSECAP00000005450,ENSECAP00000023112	CLU,MT-CO3
GO.0070271	protein complex biogenesis	2	0.029	ENSECAP00000005450,ENSECAP00000023112	CLU,MT-CO3

## Sheet: MF
#pathway ID	pathway description	observed gene count	false discovery rate	matching proteins in your network (IDs)	matching proteins in your network (labels)
GO.0003674	molecular_function	20	3.24e-15	ENSECAP00000000003,ENSECAP00000003922,ENSECAP00000005450,ENSECAP00000008853,ENSECAP00000009754,ENSECAP00000012558,ENSECAP00000017861,ENSECAP00000019820,ENSECAP00000023101,ENSECAP00000023102,ENSECAP00000023103,ENSECAP00000023104,ENSECAP00000023105,ENSECAP00000023106,ENSECAP00000023107,ENSECAP00000023108,ENSECAP00000023109,ENSECAP00000023111,ENSECAP00000023112,ENSECAP00000023113	CLU,DCN,EEF1G,MT-ATP6,MT-ATP8,MT-CO1,MT-CO2,MT-CO3,MT-CYB,MT-ND1,MT-ND2,MT-ND3,MT-ND4,MT-ND5,MT-ND6,ND1,RPLP2,RPS4,TIMP2,TPM4
GO.0016491	oxidoreductase activity	11	3.51e-14	ENSECAP00000003922,ENSECAP00000023101,ENSECAP00000023102,ENSECAP00000023103,ENSECAP00000023106,ENSECAP00000023107,ENSECAP00000023108,ENSECAP00000023109,ENSECAP00000023111,ENSECAP00000023112,ENSECAP00000023113	MT-CO1,MT-CO2,MT-CO3,MT-CYB,MT-ND1,MT-ND2,MT-ND3,MT-ND4,MT-ND5,MT-ND6,ND1
GO.0008137	NADH dehydrogenase (ubiquinone) activity	7	6.42e-13	ENSECAP00000003922,ENSECAP00000023101,ENSECAP00000023102,ENSECAP00000023103,ENSECAP00000023108,ENSECAP00000023109,ENSECAP00000023111	MT-ND1,MT-ND2,MT-ND3,MT-ND4,MT-ND5,MT-ND6,ND1
GO.0015078	hydrogen ion transmembrane transporter activity	6	9.76e-12	ENSECAP00000023104,ENSECAP00000023105,ENSECAP00000023106,ENSECAP00000023107,ENSECAP00000023112,ENSECAP00000023113	MT-ATP6,MT-ATP8,MT-CO1,MT-CO2,MT-CO3,MT-CYB
GO.0003824	catalytic activity	12	5.96e-11	ENSECAP00000003922,ENSECAP00000023101,ENSECAP00000023102,ENSECAP00000023103,ENSECAP00000023105,ENSECAP00000023106,ENSECAP00000023107,ENSECAP00000023108,ENSECAP00000023109,ENSECAP00000023111,ENSECAP00000023112,ENSECAP00000023113	MT-ATP6,MT-CO1,MT-CO2,MT-CO3,MT-CYB,MT-ND1,MT-ND2,MT-ND3,MT-ND4,MT-ND5,MT-ND6,ND1
GO.0009055	electron carrier activity	4	4.27e-07	ENSECAP00000023106,ENSECAP00000023107,ENSECAP00000023112,ENSECAP00000023113	MT-CO1,MT-CO2,MT-CO3,MT-CYB
GO.0004129	cytochrome-c oxidase activity	3	8.99e-06	ENSECAP00000023106,ENSECAP00000023107,ENSECAP00000023112	MT-CO1,MT-CO2,MT-CO3
GO.0005488	binding	8	7.29e-05	ENSECAP00000005450,ENSECAP00000008853,ENSECAP00000012558,ENSECAP00000017861,ENSECAP00000019820,ENSECAP00000023106,ENSECAP00000023107,ENSECAP00000023113	CLU,DCN,EEF1G,MT-CO1,MT-CO2,MT-CYB,RPS4,TPM4
GO.0003735	structural constituent of ribosome	2	0.00111	ENSECAP00000000003,ENSECAP00000008853	RPLP2,RPS4
GO.0003723	RNA binding	3	0.00125	ENSECAP00000008853,ENSECAP00000012558,ENSECAP00000017861	DCN,EEF1G,RPS4
GO.1901363	heterocyclic compound binding	4	0.00914	ENSECAP00000008853,ENSECAP00000012558,ENSECAP00000017861,ENSECAP00000023107	DCN,EEF1G,MT-CO1,RPS4
GO.0097159	organic cyclic compound binding	4	0.00951	ENSECAP00000008853,ENSECAP00000012558,ENSECAP00000017861,ENSECAP00000023107	DCN,EEF1G,MT-CO1,RPS4
GO.0044822	poly(A) RNA binding	2	0.0176	ENSECAP00000008853,ENSECAP00000017861	DCN,RPS4
GO.0046872	metal ion binding	4	0.0176	ENSECAP00000019820,ENSECAP00000023106,ENSECAP00000023107,ENSECAP00000023113	MT-CO1,MT-CO2,MT-CYB,TPM4
GO.0046914	transition metal ion binding	3	0.021	ENSECAP00000006408,ENSECAP00000023106,ENSECAP00000023107	MT-CO1,MT-CO2,S100A6

## Sheet: KEGG
#pathway ID	pathway description	observed gene count	false discovery rate	matching proteins in your network (IDs)	matching proteins in your network (labels)
3010	Ribosome	53	3.29e-80	ENSECAP00000000003,ENSECAP00000000228,ENSECAP00000001730,ENSECAP00000003502,ENSECAP00000004827,ENSECAP00000006504,ENSECAP00000006580,ENSECAP00000007241,ENSECAP00000007285,ENSECAP00000007656,ENSECAP00000007757,ENSECAP00000008676,ENSECAP00000008853,ENSECAP00000009568,ENSECAP00000009630,ENSECAP00000009825,ENSECAP00000010187,ENSECAP00000011773,ENSECAP00000011950,ENSECAP00000012814,ENSECAP00000012978,…	ENSECAG00000012046,ENSECAG00000015258,ENSECAG00000016459,ENSECAG00000021065,RPL10,RPL10A,RPL11,RPL12,RPL13,RPL13A,RPL14,RPL22,RPL23,RPL24,RPL27A,RPL28,RPL3,RPL30,RPL34,RPL35,RPL37,RPL38,RPL39,RPL4,RPL8,RPL9,RPLP0,RPLP1,RPLP2,RPS10,RPS11,RPS12,RPS14,RPS15A,RPS16,RPS18,RPS19,RPS2,RPS20,RPS23,RPS24,RPS25,RPS26,RPS28,RPS29,RPS3A,RPS4,RPS5,RPS6,RPS7,RPS8,RPS9,UBA52
190	Oxidative phosphorylation	13	4.28e-10	ENSECAP00000020486,ENSECAP00000023101,ENSECAP00000023102,ENSECAP00000023103,ENSECAP00000023104,ENSECAP00000023105,ENSECAP00000023106,ENSECAP00000023107,ENSECAP00000023108,ENSECAP00000023109,ENSECAP00000023111,ENSECAP00000023112,ENSECAP00000023113	ATP5G2,MT-ATP6,MT-ATP8,MT-CO1,MT-CO2,MT-CO3,MT-CYB,MT-ND1,MT-ND2,MT-ND3,MT-ND4,MT-ND5,MT-ND6
5012	Parkinson s disease	13	1.05e-09	ENSECAP00000020486,ENSECAP00000023101,ENSECAP00000023102,ENSECAP00000023103,ENSECAP00000023104,ENSECAP00000023105,ENSECAP00000023106,ENSECAP00000023107,ENSECAP00000023108,ENSECAP00000023109,ENSECAP00000023111,ENSECAP00000023112,ENSECAP00000023113	ATP5G2,MT-ATP6,MT-ATP8,MT-CO1,MT-CO2,MT-CO3,MT-CYB,MT-ND1,MT-ND2,MT-ND3,MT-ND4,MT-ND5,MT-ND6
5010	Alzheimer s disease	7	0.00861	ENSECAP00000020486,ENSECAP00000023104,ENSECAP00000023105,ENSECAP00000023106,ENSECAP00000023107,ENSECAP00000023112,ENSECAP00000023113	ATP5G2,MT-ATP6,MT-ATP8,MT-CO1,MT-CO2,MT-CO3,MT-CYB
5016	Huntington s disease	7	0.0126	ENSECAP00000020486,ENSECAP00000023104,ENSECAP00000023105,ENSECAP00000023106,ENSECAP00000023107,ENSECAP00000023112,ENSECAP00000023113	ATP5G2,MT-ATP6,MT-ATP8,MT-CO1,MT-CO2,MT-CO3,MT-CYB
4260	Cardiac muscle contraction	4	0.0483	ENSECAP00000023106,ENSECAP00000023107,ENSECAP00000023112,ENSECAP00000023113	MT-CO1,MT-CO2,MT-CO3,MT-CYB
