# Supplementary material for: Equine Adipose-Derived Mesenchymal Stromal Cells Release Extracellular Vesicles Enclosing Different Subsets of Small RNAs
Source: Stem Cells Int. 2019 Mar 18;2019:4957806. doi: 10.1155/2019/4957806 (PMC6442443; doi:10.1155/2019/4957806)
Supplement: Supplementary 3 — Additional File 3: pathway analysis of miRNA targets. [file 4957806.f3.xlsx]

## Sheet: data
Pathway analysis of miRNA targets
KEGG pathway	p-value	#genes	#miRNAs
ECM-receptor interaction	1.57549e-09	41	19
Proteoglycans in cancer	1.69623e-08	101	24
Prion diseases	7.49246e-06	10	8
Axon guidance	2.76807e-05	69	21
Signaling pathways regulating pluripotency of stem cells	2.76807e-05	71	24
TGF-beta signaling pathway	3.40551e-05	44	19
ErbB signaling pathway	3.40551e-05	50	25
Pathways in cancer	5.9275e-05	176	26
Ras signaling pathway	6.22237e-05	103	25
mTOR signaling pathway	6.63004e-05	38	22
MAPK signaling pathway	0.000163507	121	26
PI3K-Akt signaling pathway	0.000338221	151	24
Focal adhesion	0.000418262	99	24
Mucin type O-Glycan biosynthesis	0.00052904	14	15
FoxO signaling pathway	0.000782451	64	22
Glioma	0.000843188	33	22
Rap1 signaling pathway	0.000843188	98	26
GABAergic synapse	0.00110584	36	20
Renal cell carcinoma	0.00110584	36	25
Sphingolipid signaling pathway	0.0012975	58	20
Glycosphingolipid biosynthesis - lacto and neolacto series	0.00139317	13	17
Morphine addiction	0.00139317	41	18
Neurotrophin signaling pathway	0.00248041	60	25
Glycosaminoglycan biosynthesis - chondroitin sulfate / dermatan sulfate	0.00274653	11	9
Glutamatergic synapse	0.00426206	54	19
Colorectal cancer	0.00430029	33	19
Wnt signaling pathway	0.00536815	64	22
Regulation of actin cytoskeleton	0.00536815	96	22
Oxytocin signaling pathway	0.00644264	71	22
Long-term depression	0.00660092	31	20
Adrenergic signaling in cardiomyocytes	0.00660092	63	22
Protein processing in endoplasmic reticulum	0.00681588	71	22
Prostate cancer	0.00753368	43	23
Ubiquitin mediated proteolysis	0.00989847	65	21
Melanoma	0.0123726	36	20
Adherens junction	0.016881	40	21
Retrograde endocannabinoid signaling	0.0198444	48	19
p53 signaling pathway	0.0198444	36	20
cGMP-PKG signaling pathway	0.0198444	72	21
Thyroid cancer	0.02039	15	16
Non-small cell lung cancer	0.0235913	28	20
Glycosaminoglycan biosynthesis - heparan sulfate / heparin	0.0294037	13	13
HIF-1 signaling pathway	0.0318714	50	22
Choline metabolism in cancer	0.0350079	49	24
Nicotine addiction	0.0350671	21	17
Hippo signaling pathway	0.0353607	68	22
Long-term potentiation	0.035518	33	22
Hypertrophic cardiomyopathy (HCM)	0.0363575	39	17
Gap junction	0.0363575	37	21
Glycosaminoglycan biosynthesis - keratan sulfate	0.036777	8	9
Endocytosis	0.040694	90	23
Platelet activation	0.041409	56	23
Transcriptional misregulation in cancer	0.042546	73	20
Endometrial cancer	0.0434896	26	21
mRNA surveillance pathway	0.044718	41	15
SNARE interactions in vesicular transport	0.0450855	16	15
Chronic myeloid leukemia	0.0450926	34	22
N-Glycan biosynthesis	0.0498359	20	13
