# Supplementary material for: Equine Adipose-Derived Mesenchymal Stromal Cells Release Extracellular Vesicles Enclosing Different Subsets of Small RNAs
Source: Stem Cells Int. 2019 Mar 18;2019:4957806. doi: 10.1155/2019/4957806 (PMC6442443; doi:10.1155/2019/4957806)
Supplement: Supplementary 5 — Additional File 5: donors' description table. [file 4957806.f5.xlsx]

## Sheet: Foglio1
BiosampleID	Breed	Age	Sex	ID_Library
SAMN09104738	Shetland Pony	4 Years	male	3_C
SAMN09104739	Thoroughbred	3 years	male	4_C
SAMN09104736	Arab x Argentinian	3 Months	Female	1_C
SAMN09104737	Thoroughbred	3 Months	Female	2_C
